# Supplementary material
Source: Research Square preprint supplement (doi:10.21203/rs.3.rs-8369614/v2)
Supplement: Supplementary file 1 [file 1037d4aac643d6e654d0cf40.docx]

**Table S1:** Gene ontology of *AtARID* genes

| **Gene name** | **Biological Process (Acts within and involved in)** | **Cellular Component (Active and Located in)** | **Molecular Function** |
| --- | --- | --- | --- |
| *AtARID_01* | DNA templated transcription regulation, glucosinolate metabolic process, pollen germination, pollen tube growth. | Nucleus, pollen tube | Binding of transcription factor, binding of DNA, four-way junction DNA bindng, cis-regulatory region transcription, activity of DNA-binding transcription factor. |
| *AtARID_02* | Transcription regulation by RNA polymerase, glucosinolate metabolic process. | Nucleus, histone deacetylase complex. | Binding of Protein, binding of DNA, binding of transcription cis-regulatory region, binding of adenine-thymine-rich DNA minor groove. |
| *AtARID_03* | Several biological processes | Nucleus | Binding of Protein, binding of DNA, DNA-binding transcription factor activity |
| *AtARID_04* | DNA-templated transcription regulation, Polar nucleus fusion, karyogamy | Nucleus | Binding of Protein, binding of DNA, DNA-binding transcription factor activity |
| *AtARID_05* | DNA-templated transcription regulation, transcription by RNA polymerase II regulation | Nucleus, histone deacetylase complex. | Binding of Protein, binding of DNA, DNA-binding transcription factor activity, binding of transcription cis-regulatory region. |
| *AtARID_06* | Several biological processes | Nucleus | Binding of Protein, binding of DNA, DNA-binding transcription factor activity. |
| *AtARID_07* | Several biological processes | Nucleus | Several molecular functions |
| *AtARID_08* | Positive regulation of gene expression, differentiation of pollen sperm cell | Nucleus, generative cell nucleus, microsporocyte nucleus, histone deacetylase complex. | Several molecular functions |
| *AtARID_09* | DNA-templated transcription regulation, transcription by RNA polymerase II regulation | Nucleus, protein- containing complex | Binding of Protein, binding of DNA, DNA-binding transcription factor activity. |
| *AtARID_10* | Several biological processes | Nucleus, histone deacetylase complex, vacuole | Protein binding |


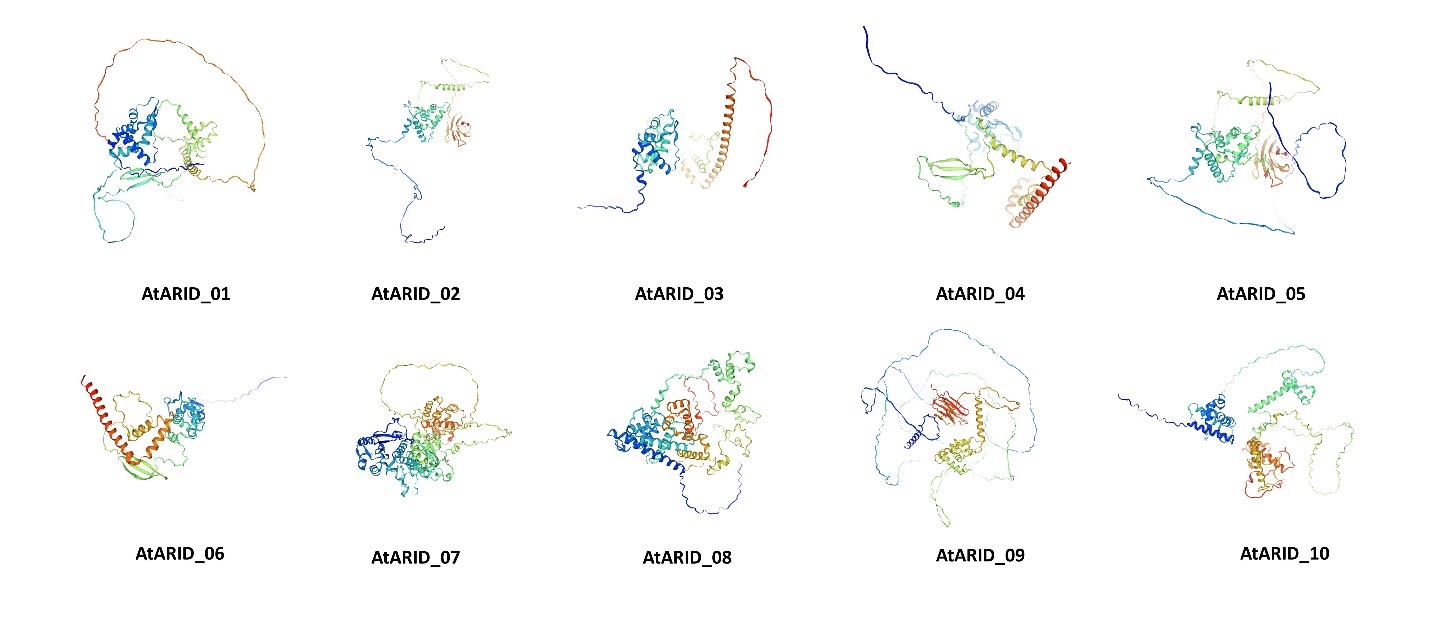


**Figure S1.** 3D structures of ARID proteins among *Arabidopsis thaliana*.


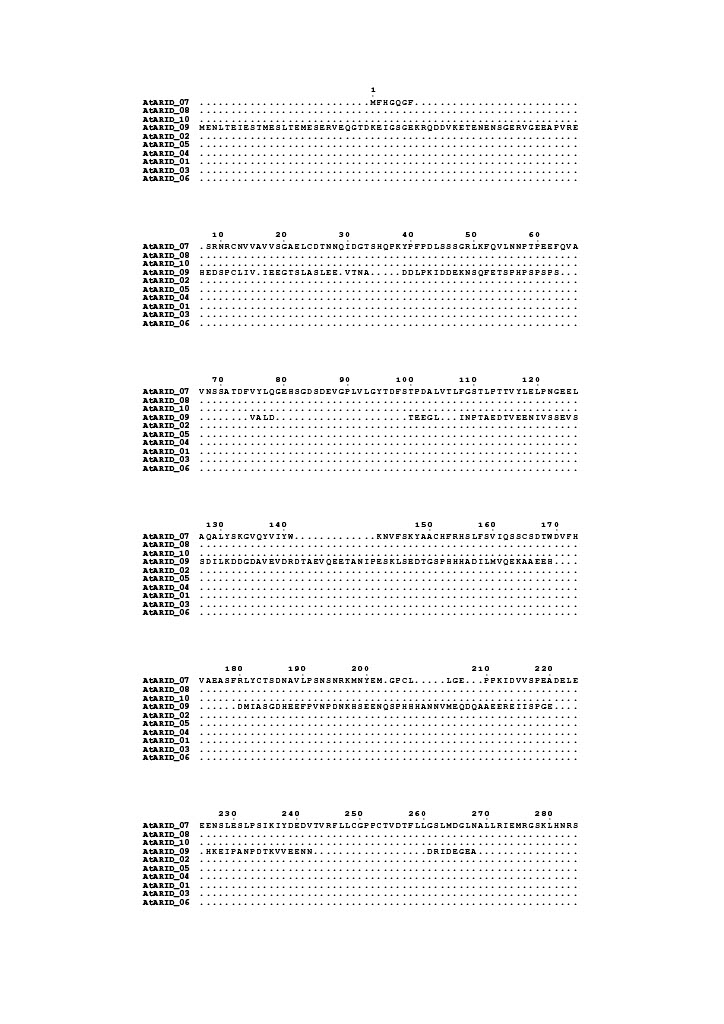

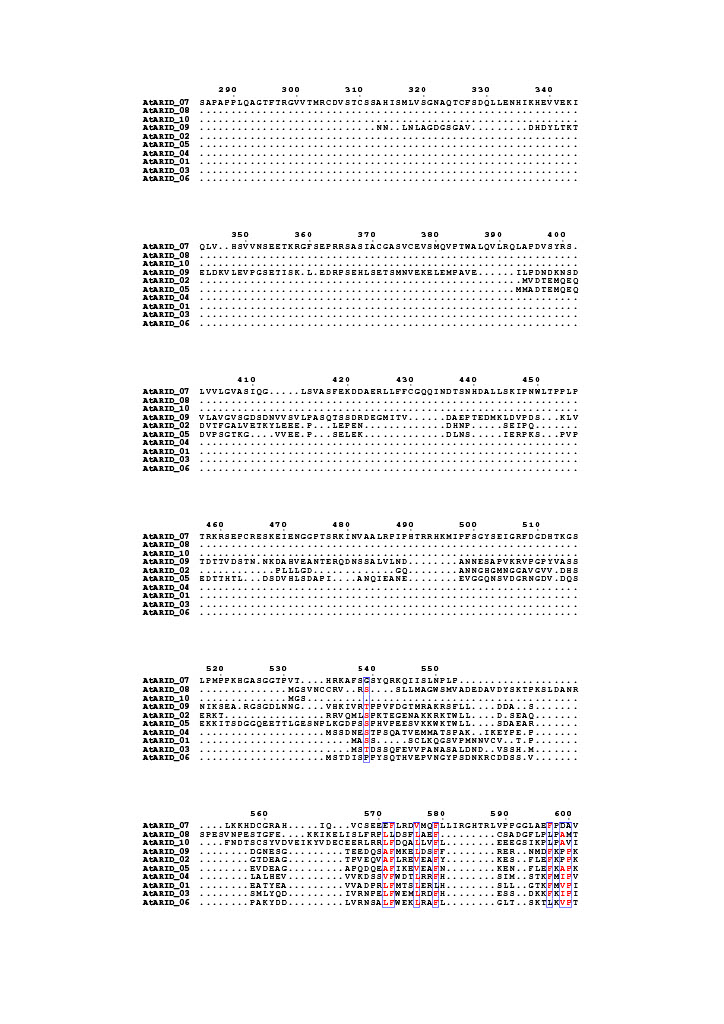


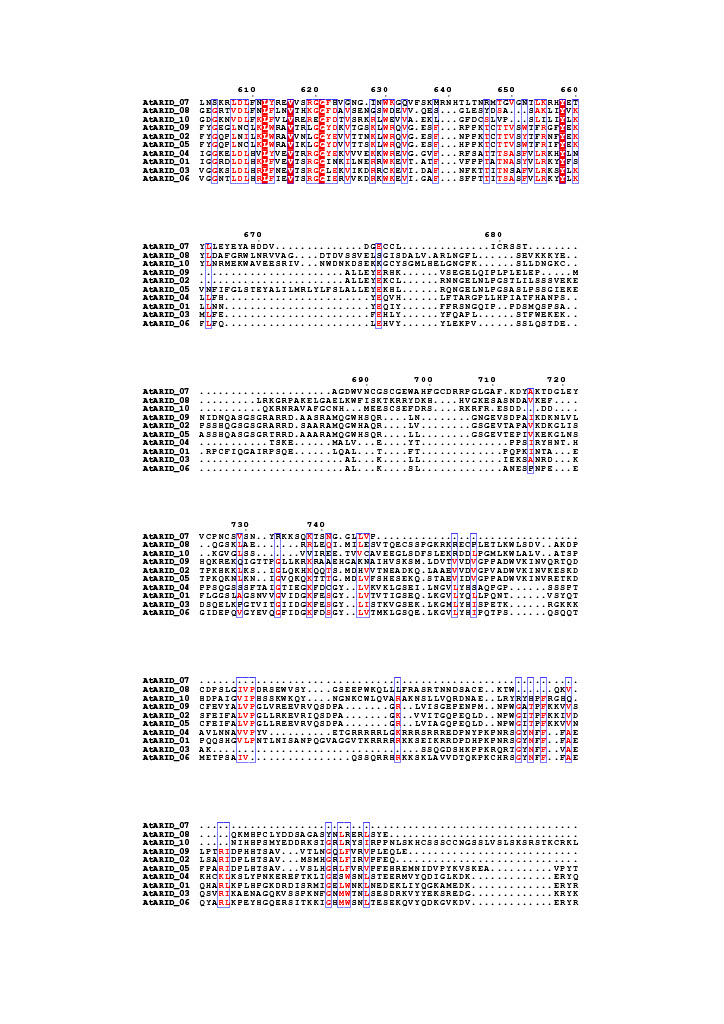

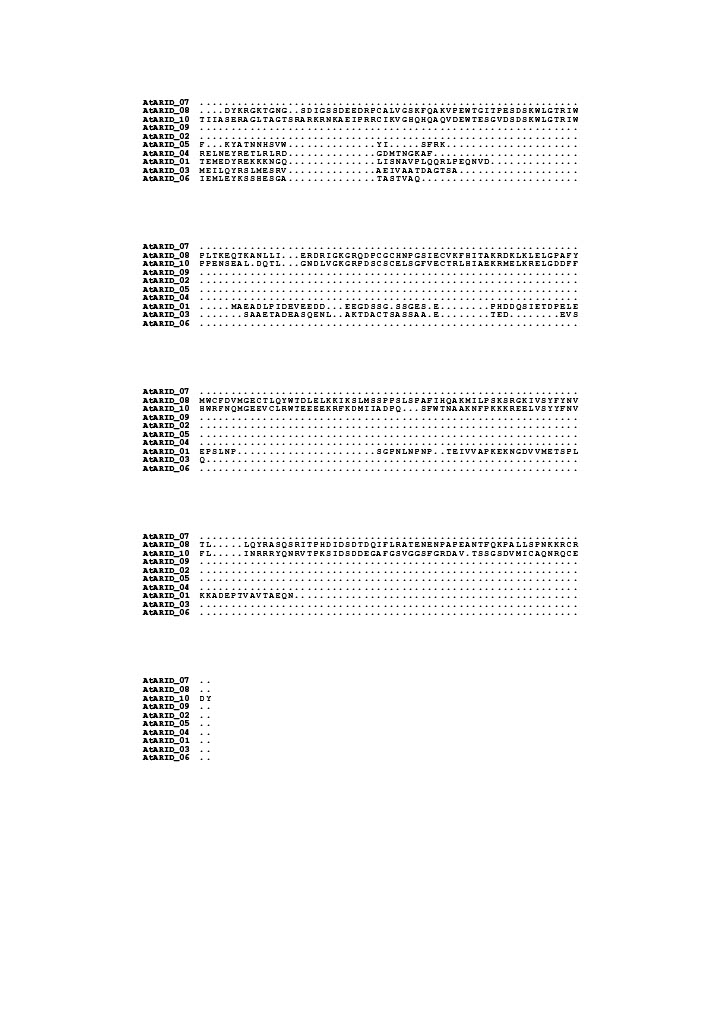


**Figure S2.** Multiple Sequence Alignment of ARID proteins among *Arabidopsis thaliana*.
